# Supplementary material for: Effect of Incorporating 1 Avocado Per Day Versus Habitual Diet on Visceral Adiposity: A Randomized Trial
Source: PubMed Central journal article supplement — J Am Heart Assoc. 2022 Jul 5;11(14):e025657. doi: 10.1161/JAHA.122.025657 (PMC9707833; doi:10.1161/jaha.122.025657), 2022-07-05
Supplement: JAH3-11-e025657-s001.pdf [file JAH3-11-e025657-s001.pdf]

# **SUPPLEMENTAL MATERIAL**

## Data S1.

### Supplemental Methods

#### Supporting analyses of VAT

The primary analysis for HAT included all participants with complete scans at baseline and follow-up. Two supporting analyses were also performed. For the first supporting analysis, all participants with an MRI scan at both baseline and follow-up were included, whether or not the scans were complete. Complete scans included 51 ‘slices’ (see Figure S1) but in some cases motion or other artifacts allowed only a smaller number of scans to be included. The scans were then analyzed with the same model used for the primary analysis. The second supporting analysis included all scans, whether or not they were complete and whether or not they were part of a baseline-follow-up pair. For this model, scans were considered repeated measures within participants and a mixed model with both fixed and random effects was fit. Using model results, least squares estimates of linear contrasts of model parameters were computed for the mean changes in the Supplemented Avocado and Diet and Habitual Diet Groups and the difference of the changes.

All three models produced qualitatively similar results; that is, a small non-significantly larger increase in VAT in the Supplemented Avocado Diet Group. All are consistent with the conclusion that there was no improvement in VAT in the Supplemented Avocado Diet Group Compared to the Habitual Diet Group.

Changes in VAT

| Primary and supporting models                                     | n    | Supplemented Avocado Diet Group | Habitual Diet Group | Estimate | 95% CI        | p-value |
|-------------------------------------------------------------------|------|---------------------------------|---------------------|----------|---------------|---------|
| 1. Primary analysis                                               |      |                                 |                     |          |               |         |
| All participants with complete follow-up MRI scans                | 923  | 0.074                           | 0.057               | 0.017    | -0.024, 0.058 | 0.405   |
| 2. All available pairs                                            |      |                                 |                     |          |               |         |
| All participants with follow-up scans, including incomplete scans | 935  | 0.072                           | 0.057               | 0.015    | -0.026, 0.055 | 0.39    |
| 3. All available scans                                            |      |                                 |                     |          |               |         |
| All baseline and follow-up scans, complete and incomplete         | 1008 | 0.077                           | 0.063               | 0.014    | -0.026, 0.054 | 0.54    |

## The HAT Investigators

### Clinical Centers:

Loma Linda: Joan Sabate (PI), Sujatha Rajaram (Co-I), Amandeep Kaur (Clinical Coordinator), Dulce Ruiz (Clinical Coordinator), Michelle Adams (Clinical Coordinator), Denise Noble (Clinic scheduler), Bryant Brito (Clinic scheduler), Terril Thomas (Web Developer), Gina Siapco (Diet recall), Alice Kim (Diet recall), Emily Harima (Diet recall), Katie Wang (Diet recall), Emily Rhodes (Diet recall), Mary Brothers (Diet recall), Julie Jones (Diet recall), Rawiwan Sirirat (Lab), Claudia Aguilar (Lab), Samuel Barnes (MRI), Shilpy Chowdhury (MRI), Spencer Long (MRI)

UCLA: Zhaoping Li (PI), Susanne Henning (Co-Inv/Lab), Irene Gilbuena (Clinical Coordinator), Anna Rasmussen (Lead Clinical Coordinator), April Sun (Clinical Coordinator), Jason Li (Clinical Coordinator), Jeraldine Guzman (Clinical Coordinator), Gail Thames (Clinic Coordinator), Dina Ben-Nissan (Dietitian), Michael Garcia (Physician), Lauren Lemieux (Physician), Vijiya Surampudi (Physician), Paivi Pajukanta (Geneticist), Jianjun Huang (Lab), Lijun Zhang (Lab)

Tufts: Alice H. Lichtenstein (PI), Nirupa R. Matthan (PI), Jean Galluccio (Clinical Coordinator), Hannah Paoletti (Clinical Coordinator), Julia White (Clinical Coordinator), Maria White (Lab), Alexander P. Lin (MRI), Huijun “Vicky” Liao (MRI), Gregory Matuszek (Data Management), Helen Rasmussen, (Diet), Verona Bembridge (Diet) Chervonte Hernandez-Lam (Diet), Wintlett Williams, (Diet), Kimberly Dupiton (Research Coordinator), Megan Miskovsky (Research Coordinator), Marlaine Parker (Clinic Scheduler), Jean McShea (Nurse), Janice Klian (Nurse), Michelle Hallam (Nurse), Margaret Vilme (Nurse), Mary Weiss (Nurse), Carmelle St. Victor (Nurse), Cheryl Gilhooly (Diet recall), Ning Qiao (Analyst), Meaghan Reardon (Diet recall), April Dupee (Research Coordinator), Caitlin McAfee (Research Coordinator), Andrew Howland (Diet recall)

University of Pennsylvania (University Park): Penny Kris-Etherton (PI), Julie Arnold, Xiaoxiao Bai (MRI), Kristin Davis, Keally Haushalter, Lia Kuder, Stacey Meily, Hannah Morris, Thomas Neuberger (MRI), Kristina Petersen (Co-PI), Glenda Palmer (MRI), Diana Priestly, Barbara Scheetz, Marcella Smith, Quinn Tenfelde, Harlee Tripp, Heidi Watts, Sheila West (Co-I), Debra Weston (MRI)

University of Pennsylvania (Hershey): Richard Legro (Co-I), Erin Hammett (Clinical Coordinator), Patsy Rawa (Clinical Coordinator), Sandra Eyer (Research Administrator), Jeff Vesek

Central Coordinating Center, Wake Forest University Health Sciences, Winston-Salem, NC: David Reboussin (PI), Mara Vitolins (Co-I), Laura Lovato (Biostatistician), Patty Davis (Programmer), Mark King (Programmer), Debbie Felton (Project Manager), Letitia Perdue (Project Manager), John Hepler (Web Developer)

Hass Avocado Board: Nikki Ford, Feon Cheng

## **Table S1. Inclusion and exclusion criteria.**

### Inclusion Criteria

- Increased waist circumference defined as  $\geq 35$  inches for women,  $\geq 40$  inches for men (NCEP ATP III 2005)
- At least 25 years old at screening
- Not currently eating more than 2 avocados per month (habitual intake in U.S.)

### Exclusion Criteria

- Does not eat avocados
- Sensitive / allergic to avocados
- Allergies to latex or oral allergy syndrome
- Not willing or unable to undergo MRI scans
- Unstable medical condition such as on dialysis for renal disease, cardiac, gastrointestinal, or hepatic disease, cancer (non-melanoma skin cancer  $>5$  years ago acceptable, any cancer site  $>10$  yrs without recurrence).
- Pregnant, lactating, intention of pregnancy
- Lost or gained 10 lbs of body weight in last year
- Following restricted or weight loss dietary patterns
- Unstable anti-anxiety / anti-depressive / anti-psychotic medication use defined as dose change within last 6 months
- Oral steroid use within the last 6 months longer than 7 days
- Elevated alcohol intake (7+ drinks/week women; 14+ drinks/week men)
- Participation in another clinical intervention trial within 30 days of baseline
- PI judgment

From: The design and rationale of a multi-center randomized clinical trial comparing one avocado per day to usual diet: The Habitual Diet and Avocado Trial (HAT) [15].

**Table S2. Diet Composition at baseline and during the intervention derived from 24 hour recall at each visit\***

| Variables                | Avocado Supplemented Diet Group |       |       |      | Habitual Diet Group |       |      |      | Estimated Mean difference** | p-value          |
|--------------------------|---------------------------------|-------|-------|------|---------------------|-------|------|------|-----------------------------|------------------|
|                          | Baseline                        |       |       |      | Intervention        |       |      |      |                             |                  |
|                          | 8 wk                            | 16 wk | 26 wk | 8 wk | 16 wk               | 26 wk |      |      |                             |                  |
| N                        | 504                             | 490   | 479   | 472  | 503                 | 486   | 487  | 480  |                             |                  |
| Energy, kcal             | 1889                            | 2046  | 2053  | 2029 | 1839                | 1874  | 1873 | 1880 | 117                         | <b>0.009</b>     |
| Protein, g               | 78                              | 77    | 79    | 77   | 82                  | 82    | 82   | 79   | 0.5                         | 0.846            |
| Animal protein, g        | 51                              | 49    | 51    | 49   | 56                  | 56    | 56   | 53   | -0.1                        | 0.979            |
| Vegetable protein, g     | 27                              | 29    | 28    | 28   | 26                  | 26    | 26   | 26   | 0.6                         | 0.523            |
| Protein, %E              | 17                              | 15    | 16    | 16   | 18                  | 18    | 18   | 18   | -1.4                        | <b>0.001</b>     |
| Carbohydrates, g         | 213                             | 212   | 211   | 211  | 202                 | 205   | 207  | 205  | -4.6                        | 0.406            |
| Carbohydrates, %E        | 44                              | 40    | 39    | 40   | 43                  | 43    | 42   | 43   | -4.1                        | <b>&lt;0.001</b> |
| Fiber, g/d               | 20                              | 29    | 29    | 28   | 20                  | 19    | 19   | 19   | 9.4                         | <b>&lt;0.001</b> |
| Fiber, g/1000 kcal       | 11                              | 15    | 15    | 15   | 11                  | 11    | 11   | 11   | 4                           | <b>&lt;0.001</b> |
| Fat, g                   | 81                              | 101   | 100   | 99   | 80                  | 81    | 80   | 82   | 18                          | <b>&lt;0.001</b> |
| Fat, %E                  | 37                              | 43    | 43    | 43   | 38                  | 38    | 37   | 38   | 6.0                         | <b>&lt;0.001</b> |
| SFA, g                   | 27                              | 29    | 29    | 28   | 26                  | 27    | 26   | 27   | 1.3                         | 0.207            |
| SFA, %E                  | 12                              | 12    | 12    | 12   | 12                  | 12    | 12   | 13   | 0.0                         | 0.945            |
| MUFA, g                  | 29                              | 42    | 42    | 42   | 28                  | 29    | 28   | 30   | 13.0                        | <b>&lt;0.001</b> |
| MUFA, %E                 | 13                              | 18    | 18    | 18   | 13                  | 13    | 13   | 13   | 5.2                         | <b>&lt;0.001</b> |
| PUFA, g                  | 19                              | 21    | 20    | 20   | 18                  | 18    | 18   | 18   | 1.4                         | 0.067            |
| PUFA, %E                 | 9                               | 9     | 8     | 9    | 9                   | 8     | 8    | 8    | 0.0                         | 0.988            |
| Omega-3 FA, g            | 2.0                             | 2.1   | 2.0   | 2.1  | 2.1                 | 2.0   | 2.0  | 2.1  | 0.12                        | 0.286            |
| Omega-6 FA, g            | 17                              | 18    | 18    | 18   | 16                  | 16    | 16   | 16   | 1.2                         | 0.074            |
| Cholesterol, mg/d        | 285                             | 285   | 309   | 303  | 313                 | 314   | 321  | 321  | 7.9                         | 0.582            |
| Cholesterol, g/1000 kcal | 154                             | 143   | 153   | 152  | 177                 | 174   | 182  | 177  | -5.3                        | 0.473            |
| Alcohol, %E              | 2                               | 1.7   | 2.1   | 2    | 1.6                 | 1.6   | 2    | 2.3  | -0.4                        | 0.128            |
| HEI                      | 53                              | 62    | 62    | 62   | 54                  | 54    | 54   | 55   | 8.4                         | <b>&lt;0.001</b> |

\* Recalls were collected via phone call within +/- 2-weeks of the intervention visit timepoints

\*\* Estimated mean change from baseline averaged over follow-up. Visit specific values are estimates from a mixed effects model. See Methods.

SFA, saturated fatty acid; MUFA, monounsaturated fatty acid; PUFA, polyunsaturated fatty acid; FA, fatty acid; HEI, healthy eating index.

**Table S3. Descriptive Statistics of MRI Measures (mean +/- SD)**

| Variable         | Supplemented Avocado Diet Group (n=505) |                    | Habitual Diet Group (n=503) |                    |
|------------------|-----------------------------------------|--------------------|-----------------------------|--------------------|
|                  | Baseline                                | End of Study visit | Baseline                    | End of Study visit |
| VAT <sup>1</sup> | 3.2 ± 1.4                               | 3.3 ± 1.3          | 3.2 ± 1.4                   | 3.3 ± 1.4          |
| HFF <sup>2</sup> | 9.5 ± 9.9                               | 10.2 ± 10.6        | 10.2 ± 11.2                 | 10.5 ± 11.0        |

VAT = visceral adipose tissue volume (in liters); HFF = hepatic fat fraction.

**Table S4. Visceral adipose tissue (VAT) measures by subgroup.**

| Subgroups                  | n   | Supplemented Avocado Diet Group | Habitual Diet Group | Estimate | 95% CI        | p-value |
|----------------------------|-----|---------------------------------|---------------------|----------|---------------|---------|
| VAT (L) – all participants | 923 | 0.074                           | 0.057               | 0.017    | -0.024, 0.058 | 0.405   |
| Sex                        |     |                                 |                     |          |               | 0.808   |
| Women                      | 679 | 0.077                           | 0.056               | 0.020    | -0.027, 0.068 |         |
| Men                        | 244 | 0.067                           | 0.058               | 0.009    | -0.071, 0.089 |         |
| Non-Hispanic White         |     |                                 |                     |          |               | 0.273   |
| Yes                        | 512 | 0.072                           | 0.077               | -0.005   | -0.060, 0.050 |         |
| No                         | 411 | 0.073                           | 0.031               | 0.041    | -0.020, 0.103 |         |
| VAT (L)                    |     |                                 |                     |          |               | 0.126   |
| Low [ $\leq$ 3L]           | 462 | 0.107                           | 0.058               | 0.050    | -0.008, 0.108 |         |
| High [ $>$ 3L]             | 461 | 0.041                           | 0.055               | -0.014   | -0.072, 0.044 |         |
| Kcal intake                |     |                                 |                     |          |               | 0.425   |
| Low [ $\leq$ 1749]         | 460 | 0.088                           | 0.070               | 0.018    | -0.040, 0.076 |         |
| High [ $>$ 1749]           | 463 | 0.061                           | 0.042               | 0.019    | -0.038, 0.077 |         |
| HEI (0-100)                |     |                                 |                     |          |               | 0.889   |
| Low [ $\leq$ 52.7]         | 450 | 0.064                           | 0.044               | 0.019    | -0.040, 0.078 |         |
| High [ $>$ 52.7]           | 473 | 0.083                           | 0.069               | 0.025    | -0.033, 0.082 |         |

VAT, visceral adipose tissue volume (in liters); Kcal, kilocalories; HEI, Healthy Eating Index (range from 0-100).

**Table S5. Effect of COVID-19 shutdown on follow-up MRIs.**

| Follow-up MRI scan | BEFORE shutdown | DURING shutdown | Total |
|--------------------|-----------------|-----------------|-------|
| Not done           | 38              | 34              | 72    |
| Done               | 754             | 182             | 936   |
| Within window      | 749             | 120             | 869   |
| > 7 months         | 5               | 62              | 67    |
| Total Participants | 792             | 216             | 1008  |

From: The design and rationale of a multi-center randomized clinical trial comparing one avocado per day to usual diet: The Habitual Diet and Avocado Trial (HAT) [15].



Figure S1. Representative example of MRI image for VAT.

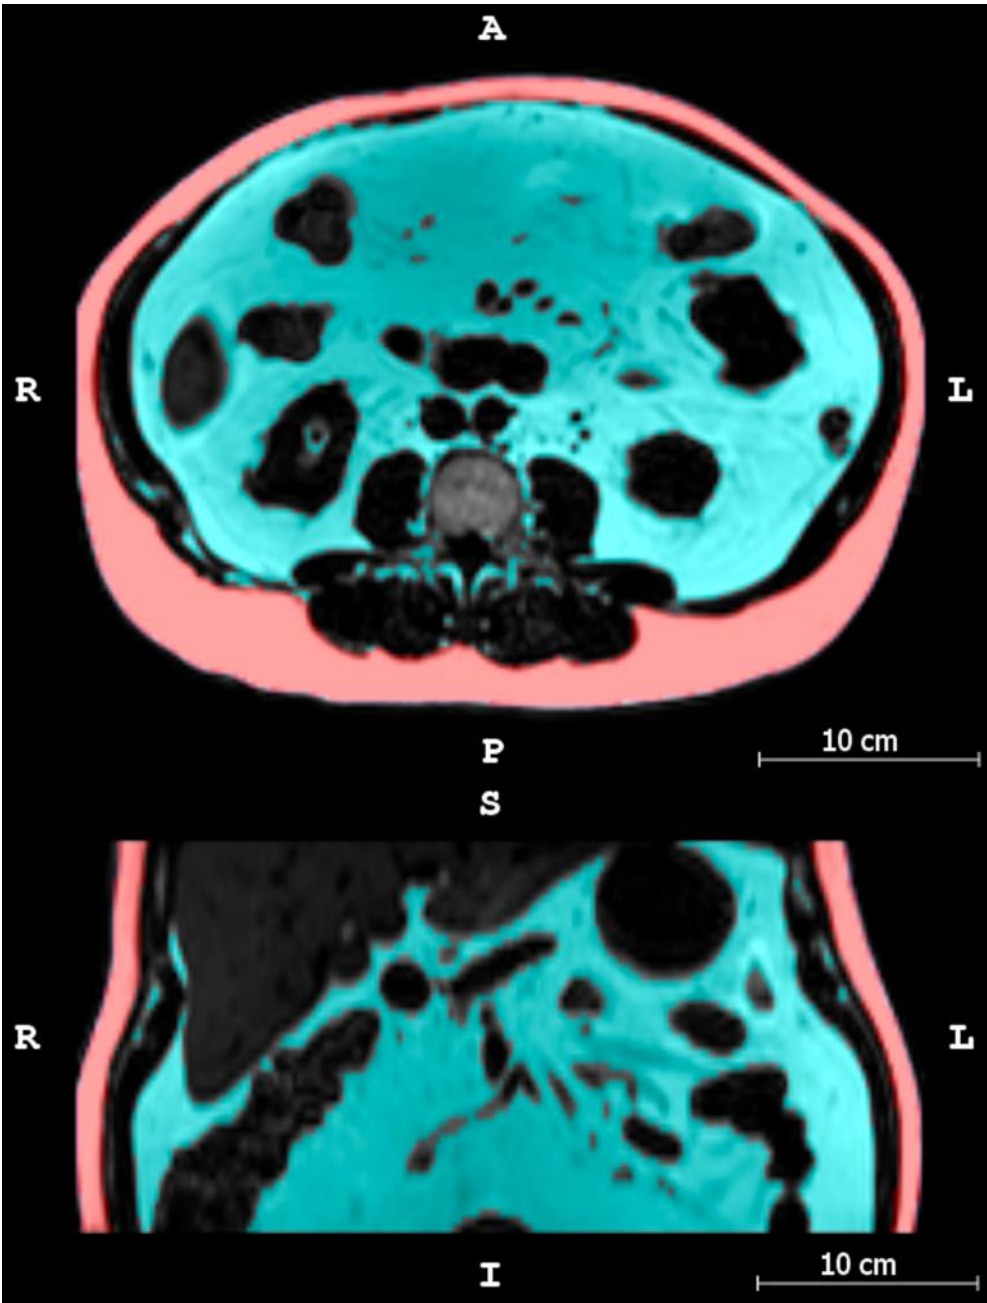

Figure S2. Boxplots for the VAT and HFF data at baseline and end of study, by arm.

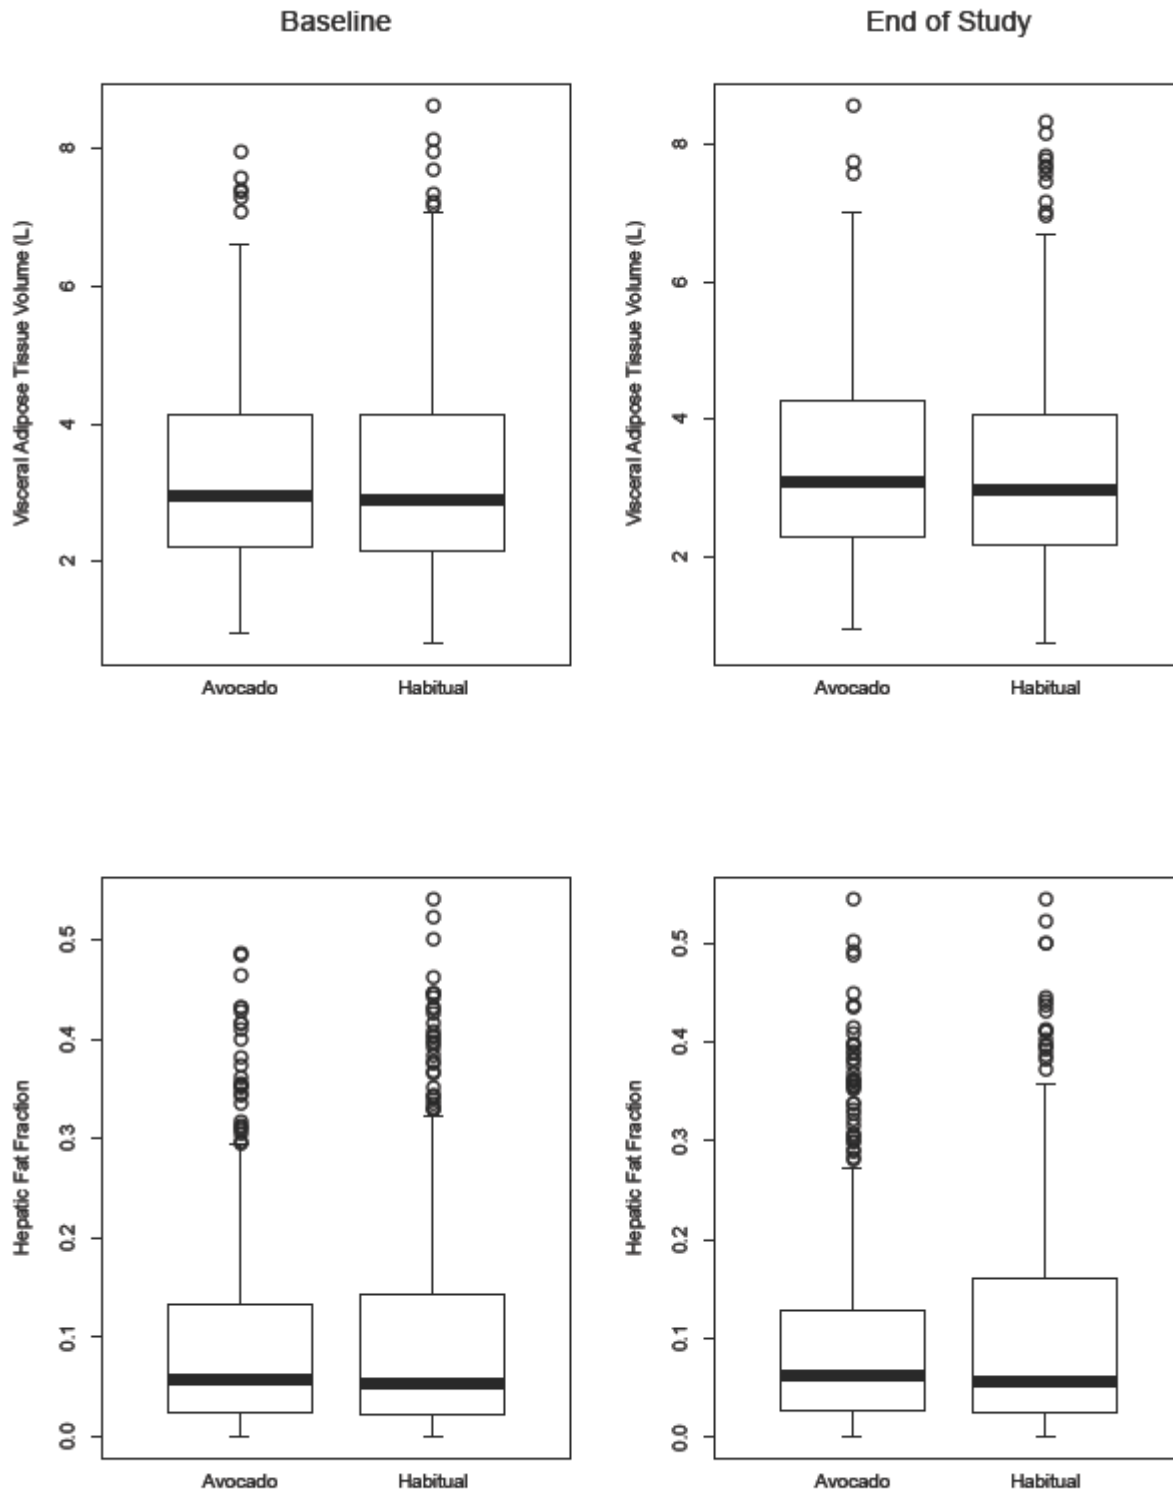

Note: Data are presented as box plots. The box stretches from the 25th to the 75th percentile. The median is shown with a line across the box. The whiskers indicate 1.5 times the interquartile range above the third and below the first quartiles, or the upper or lower extreme values, whichever is closer. Open circles indicate observations outside the range of the upper whisker.
